# Supplementary material for: Attempts to lose weight among overweight and non-overweight adolescents: a cross-national survey
Source: PubMed Central journal article supplement (PMC2174511; doi:10.1186/1479-5868-4-50), 2007-10-14
Supplement: 1479-5868-4-50-S1.pdf [file 1479-5868-4-50-S1.pdf]

## Additional file 1: Additional tables on weight control practices

**Table 4** Prevalence of weight control practices among non-overweight and overweight boys who tried to control their weight during the last 12 months by country.

|                                             | %            |                         |                         |           |           |            |           |            |            |            |           |            |           |            |            |
|---------------------------------------------|--------------|-------------------------|-------------------------|-----------|-----------|------------|-----------|------------|------------|------------|-----------|------------|-----------|------------|------------|
|                                             | Belgium (Fl) |                         | Estonia                 |           | Finland   |            | Greece    |            | Latvia     |            | Poland    |            | USA       |            |            |
|                                             | (n)          | N <sup>1</sup><br>(223) | O <sup>2</sup><br>(110) | N<br>(81) | O<br>(20) | N<br>(137) | O<br>(86) | N<br>(301) | O<br>(170) | N<br>(185) | O<br>(31) | N<br>(168) | O<br>(36) | N<br>(118) | O<br>(137) |
| Exercise                                    |              | 84                      | 78                      | 86        | 80        | 90         | 81        | 85         | 88         | 78         | 77        | 93         | 92        | 97         | 95         |
| Less sweets                                 |              | 80                      | 90*                     | 28        | 45        | 73         | 88**      | 67         | 78*        | 60         | 83*       | 50         | 77**      | 73         | 79         |
| More water                                  |              | 73                      | 82                      | 38        | 30        | 56         | 75**      | 64         | 76**       | 57         | 73        | 55         | 43        | 80         | 79         |
| More fruit and/or vegetables                |              | 64                      | 71                      | 46        | 35        | 67         | 71        | 67         | 66         | 68         | 90**      | 62         | 51        | 66         | 54         |
| Less fat                                    |              | 59                      | 76**                    | 30        | 55*       | 67         | 84**      | 64         | 71         | 68         | 80        | 45         | 66*       | 58         | 71*        |
| Less soft drinks                            |              | 59                      | 76**                    | 28        | 60**      | 56         | 71*       | 49         | 67**       | 49         | 34        | 34         | 40        | 48         | 65**       |
| Smaller amounts                             |              | 44                      | 55                      | 26        | 35        | 40         | 60**      | 60         | 77**       | 44         | 76**      | 39         | 71**      | 46         | 73***      |
| Skipping meals                              |              | 21                      | 22                      | 18        | 25        | 31         | 38        | 46         | 59**       | 29         | 52**      | 32         | 60        | 39         | 45         |
| Restrict diet                               |              | 11                      | 12                      | 11        | 25        | 16         | 12        | 12         | 13         | 25         | 24        | 26         | 26        | 7          | 13         |
| Fasting                                     |              | 4                       | 5                       | 5         | 5         | 10         | 6         | 18         | 11         | 16         | 14        | 9          | 6         | 14         | 17         |
| Smoking                                     |              | 7                       | 11                      | 9         | 15        | 9          | 10        | 5          | 8          | 16         | 3         | 10         | 9         | 10         | 10         |
| Diet pills, laxatives                       |              | 2                       | 6*                      | 1         | 0         | 3          | 2         | 0          | 1          | 12         | 0         | 4          | 11        | 8          | 8          |
| Vomiting                                    |              | 3                       | 1                       | 4         | 5         | 7          | 4         | 4          | 1          | 14         | 3         | 2          | 3         | 4          | 3          |
| Dieting under supervision of a professional |              | 5                       | 13*                     | 2         | 0         | 6          | 5         | 6          | 15**       | 11         | 4         | 2          | 11**      | 3          | 10*        |

<sup>1</sup>Non-overweight, <sup>2</sup>Overweight (includes obese)

Analysis between non-overweight and overweight adolescents was performed with a Chi-square or Fisher's exact test.

\*\*\* p<0.001

\*\* p<0.01

\* p<0.05

**Table 5** Prevalence of weight control practices among non-overweight and overweight girls who tried to control their weight during the last 12 months by country.

|                                             | %            |                         |                         |            |           |            |            |            |            |            |           |            |           |            |            |
|---------------------------------------------|--------------|-------------------------|-------------------------|------------|-----------|------------|------------|------------|------------|------------|-----------|------------|-----------|------------|------------|
|                                             | Belgium (Fl) |                         | Estonia                 |            | Finland   |            | Greece     |            | Latvia     |            | Poland    |            | USA       |            |            |
|                                             | (n)          | N <sup>1</sup><br>(723) | O <sup>2</sup><br>(140) | N<br>(300) | O<br>(19) | N<br>(656) | O<br>(123) | N<br>(647) | O<br>(120) | N<br>(486) | O<br>(32) | N<br>(534) | O<br>(45) | N<br>(352) | O<br>(136) |
| Exercise                                    |              | 78                      | 72                      | 86         | 79        | 91         | 91         | 74         | 72         | 75         | 71        | 90         | 86        | 93         | 90         |
| Less sweets                                 |              | 91                      | 94                      | 77         | 84        | 89         | 95*        | 80         | 90         | 81         | 96*       | 84         | 100**     | 86         | 86         |
| More water                                  |              | 83                      | 88                      | 68         | 74        | 77         | 85         | 75         | 88**       | 69         | 85        | 64         | 68        | 84         | 84         |
| More fruit and/or vegetables                |              | 72                      | 76                      | 67         | 32**      | 79         | 84         | 75         | 76         | 76         | 85        | 77         | 93**      | 62         | 70         |
| Less fat                                    |              | 76                      | 81                      | 71         | 74        | 82         | 88         | 76         | 81         | 84         | 92        | 78         | 79        | 81         | 80         |
| Less soft drinks                            |              | 72                      | 82*                     | 57         | 58        | 74         | 86**       | 71         | 81*        | 57         | 84**      | 60         | 68        | 72         | 80*        |
| Smaller amounts                             |              | 66                      | 75                      | 66         | 63        | 66         | 71         | 72         | 82*        | 72         | 79        | 80         | 98***     | 80         | 84         |
| Skipping meals                              |              | 35                      | 37                      | 48         | 47        | 53         | 47         | 57         | 65         | 50         | 56        | 69         | 81        | 62         | 72**       |
| Restrict diet                               |              | 16                      | 18                      | 18         | 16        | 24         | 22         | 12         | 16         | 17         | 26        | 32         | 45        | 16         | 27**       |
| Fasting                                     |              | 6                       | 6                       | 13         | 5         | 12         | 9          | 11         | 14         | 18         | 14        | 14         | 19        | 25         | 30         |
| Smoking                                     |              | 11                      | 17                      | 12         | 10        | 12         | 13         | 5          | 5          | 8          | 9         | 11         | 10        | 11         | 15         |
| Diet pills, laxatives                       |              | 4                       | 9**                     | 6          | 10        | 2          | 3          | 0          | 2          | 4          | 13        | 15         | 17        | 14         | 18         |
| Vomiting                                    |              | 5                       | 3                       | 7          | 10        | 10         | 10         | 2          | 2          | 5          | 8         | 10         | 12        | 8          | 8          |
| Dieting under supervision of a professional |              | 6                       | 20***                   | 2          | 5         | 0          | 4*         | 12         | 27***      | 5          | 14        | 1          | 12***     | 5          | 10*        |

<sup>1</sup>Non-overweight, <sup>2</sup>Overweight (includes obese)

Analysis between non-overweight and overweight adolescents was performed with a Chi-square or Fisher's exact test.

\*\*\* p<0.001

\*\* p<0.01

\* p<0.05
